# Supplementary material for: Preparation of Bio-Foam Material from Steam-Exploded Corn Straw by In Situ Esterification Modification
Source: MDPI journal article supplement (doi:10.3390/polym15092222), 2023-05-08
Supplement: s1 [file s1]

# Supplementary Materials

## 1. Preparation and Testing

Prior to the modification of straw, we also explored the esterification conditions of pure cellulose and lignin. The possibility of esterification of pure cellulose and lignin using a VA cross-linking reagent was determined.

### 1.1. Esterification of Cellulose

Firstly, 2.025 g of cotton pulp cellulose containing 0.0125 mol of dehydrated glucose unit (AGU) and 50 mL of DMSO were fully intensively mixed in a metal bath at 60 °C for 10 minutes; after that, 2.5 mL of 10 mol/L NaOH solution was added and stirred for another 5 minutes. Then, the mixture was reacted in an oil bath at 110 °C for 20 min with the addition of VA (the molar ratio of AGU to VA was 1:6) where the cellulose was fully activated. At the end of the procedure, the reaction was stopped by adding 200 mL of alcohol. Finally, the sample was washed with deionized water and ethanol until the filtrate was neutral and then it was dried in the oven at 60 °C.

**Table S1.** The orthogonal experimental design for the esterification modification of the steam-exploded corn straw.

| Factor                | level 1 | level 2 | level 3 | level 4 |
|-----------------------|---------|---------|---------|---------|
| A: Temperature (°C)   | 90      | 100     | 110     | 120     |
| B: Time (min)         | 10      | 15      | 20      | 25      |
| C: Amount of VA (mol) | 0.04    | 0.06    | 0.08    | 0.10    |

### 1.2. Esterification of Lignin

In this process, 1 g of dealkaline lignin was weighed and dispersed in 40 mL of DMSO solvent, which was fully intensively mixed in the metal bath at 60 °C for 10 minutes; after that, 2.5 mL of 10 mol/L NaOH solution was added and stirred for another 5 minutes. Then, the mixture was reacted in an oil bath at 110 °C for 20 min with the addition of VA (the molar ratio of AGU to VA was 1:6) where the cellulose was fully activated. At the end of the procedure, the reaction was stopped by adding 200 mL of alcohol. Finally, the sample was washed with deionized water and ethanol until the filtrate was neutral, and then it was dried in the oven at 60 °C.

### 1.3. Esterification of Steam-exploded Corn Straw

The orthogonal experiment is shown in Table S2. The detailed pretreatment conditions of temperature, time, and the amount of esterification reagent (VA) on the reaction efficiency were studied.

**Table S2.** Summary of specific reaction conditions and DS results of esterification.

| Number | Temperature(°C) | Time(min) | Amount of VA (mol) | DS (mmol/g) |
|--------|-----------------|-----------|--------------------|-------------|
| s1     | 90              | 20        | 0.06               | 4.36        |
| s2     | 90              | 10        | 0.04               | 3.83        |
| s3     | 90              | 15        | 0.10               | 4.63        |
| s4     | 90              | 25        | 0.08               | 4.85        |
| s5     | 100             | 20        | 0.10               | 4.48        |
| s6     | 100             | 15        | 0.06               | 4.17        |
| s7     | 100             | 10        | 0.08               | 4.43        |
| s8     | 100             | 25        | 0.04               | 3.83        |
| s9     | 110             | 10        | 0.10               | 4.36        |
| s10    | 110             | 15        | 0.04               | 3.45        |
| s11    | 110             | 20        | 0.08               | 4.70        |

| Number | Temperature(°C) | Time(min) | Amount of VA (mol) | DS (mmol/g) |
|--------|-----------------|-----------|--------------------|-------------|
| s12    | 110             | 25        | 0.06               | 4.08        |
| s13    | 120             | 25        | 0.10               | 4.70        |
| s14    | 120             | 20        | 0.04               | 4.41        |
| s15    | 120             | 15        | 0.08               | 4.22        |
| s16    | 120             | 10        | 0.06               | 4.65        |

#### 1.4. The Simulation Analysis Method with Finite Element

COMSOL software was used to simulate the thermal insulation performance of Lig-HCCP-SECs-4.5 foam at 60 °C and 100 °C. The simulation parameters were obtained according to the tests of thermal conductivity and true density. The specific parameters are shown in the following Table S3.

**Table S3.** Modeling preferences of simulation analysis method of thermal insulation performance.

| Parameters | Thermal conductivity<br>(W/ (m·K) ) | Heat capacity<br>(J/ (g·K) ) | Density<br>(g/cm <sup>3</sup> ) | Porosity (%) |
|------------|-------------------------------------|------------------------------|---------------------------------|--------------|
| Value      | 0.028                               | 1.89                         | 0.028                           | 90.3         |

## 2. Results and discussion

### 2.1. Morphological Characterization of corn straw

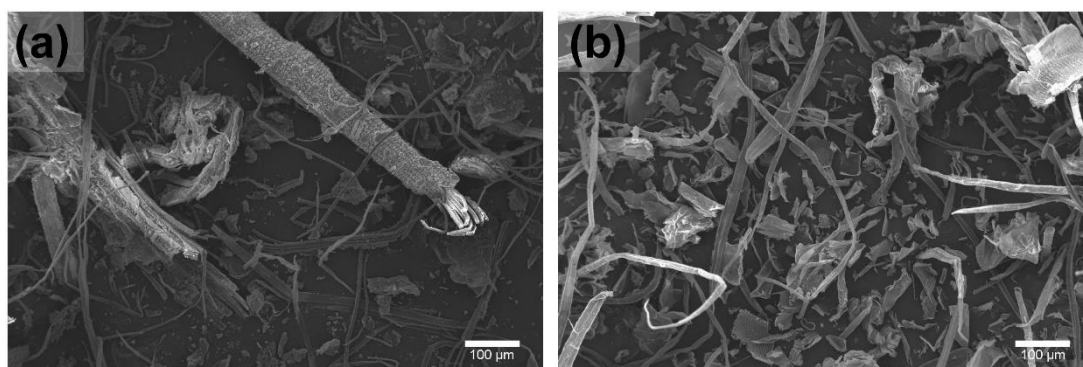

**Figure S1.** SEM images of raw corn straw (a); steam-exploded corn straw (b).

It can be seen from Figure S1a and Figure S1b, after the explosion treatment, that the internal fiber bundles were separated and crushed.

### 2.2. The Chemical Structure Characterization

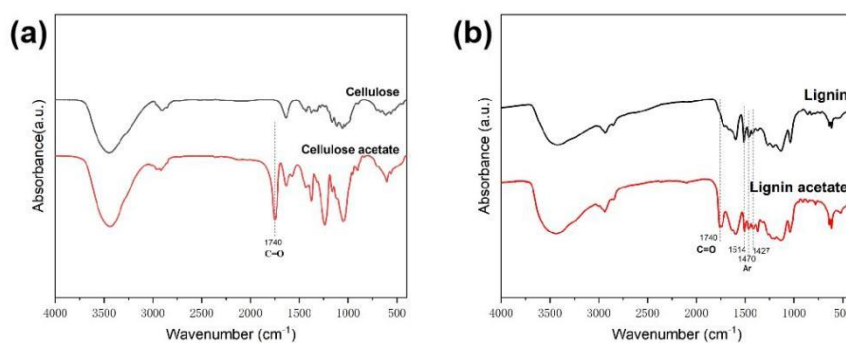

**Figure S2.** FT-IR spectra of pure cellulose (a) and lignin (b) before and after esterification.

The FTIR spectra of pure cellulose and lignin before and after esterification is shown in Figure S2. The absorption peak at  $1740\text{ cm}^{-1}$  belongs to the  $\text{C}=\text{O}$  stretching vibration of acetyl groups, indicating that both had been successfully esterified. The possibility of esterification of pure cellulose and lignin using VA crosslinking reagent was determined.

The  $^{13}\text{C}$  NMR spectra of esterified cellulose and lignin were detected and are illustrated in Figure S3.

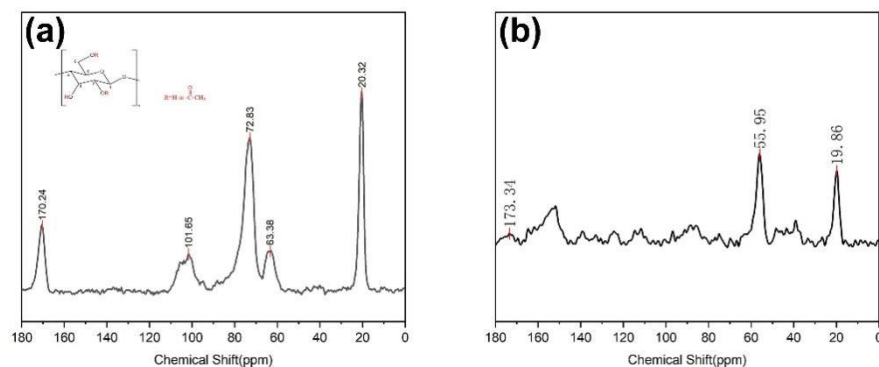

**Figure S3.** The  $^{13}\text{C}$  NMR spectra of esterified cellulose (a) and lignin (b).

All the characteristic peaks were visible. As shown in Figure S3a, the appearance of the peaks at 170.3, 169.4, and 169.0 ( $\text{C}=\text{O}$  at C6, C3, and C2 positions, respectively), the peak located at 62–103 ppm (carbons of the anhydroglucose ring), and the peak at 20 ppm ( $\text{CH}_3$ ) showed the successful synthesis of esterified cellulose[54]. At the same time, as shown in Figure S3b, the characteristic peaks at 173 ppm ( $\text{COOH}$ ), 55.95 ppm ( $\text{CH}_3\text{O}$ ), and 19.86 ppm ( $\text{CH}_3$  in  $\text{CH}_3\text{COO}$ ) appeared in the spectra which also illustrated that the acetylated lignin had been prepared [55].

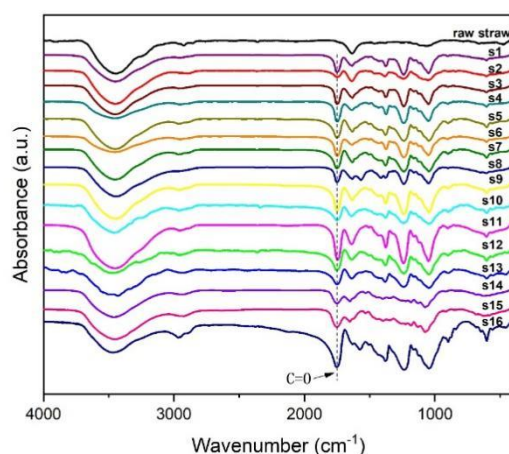

**Figure S4.** FT-IR spectra of raw straw and all esterified products.

For all the ECS- $x$  samples, the FTIR spectra are shown in Figure S4. The peak located at  $1740\text{ cm}^{-1}$  was attributed to the stretching vibration of  $\text{C}=\text{O}$ , indicating the success of the esterification reaction. Noticeably, the greater the DS, the more intensive the peak at  $1740\text{ cm}^{-1}$ , indicating that the content of  $\text{C}=\text{O}$  increased.
